# Supplementary material for: A novel eukaryotic denitrification pathway in foraminifera
Source: PubMed Central journal article supplement — Curr Biol. Author manuscript; Available in PMC 2019 Oct 8. (PMC6783311; doi:10.1016/j.cub.2018.06.027), 2018-08-02

## Supplemental Information titles and legends

**Data S1. Sequence alignment of denitrification enzymes in *Globobulimina*. Related to Figures 2–4.** Multiple sequence alignment of representative protein sequences of *Globobulimina* Nrt, NirK and Nor (shown in bold) with homologs obtained from literature. Functional associated domains obtained by CD search of individual sequences are highlighted in different colours. **A)** Two types of Nrt with homologs from literature. The typical prokaryotic NarK superfamily domain is present in all of them. Note that although the Nterminus of Nrt II is incomplete it has an extended length in comparison to the other homologs (Nrt I: GloG15\_CONTIG80510:375-855,926-2061(+); Nrt II: GloG15\_CONTIG110211:243-1504,1578-2146(-)). **B)** Two representative NirK sequences and corresponding homologs from literature. The cupredoxin domains I and II are represented in grey and blue, respectively. Conserved copper ligand binding sites are highlighted in green. Furthermore, amino acid residues at predicted splice site positions on the corresponding genome contig sequences are shown with a black background, and nucleotides surrounding individual splice sites are mentioned above. Nucleotides flanking splice sites are shown by sequence outlines starting with the 3'-end of the exon before (i.e., exon|intron|exon). Splice sites were mapped from genomic splice sites prediction obtained for associated genomic contigs using BRAKER tool (GloG15\_CONTIG58586 for NirK I and GloG15\_CONTIG57448 for NirK II). One splice site shown in brackets relies on manual prediction based on the break in sequence similarity of the transcript in comparison to the genomic contig and presence of canonical nucleotides found and splice sites. (NirK I: GloT15\_NODE\_12185:141-2504(-); NirK II: GloT15\_NODE\_4197:1119-3623(+)). **C)** Two types of Nor with homologs from Nor and Nod candidates. The typical Cytochrome c oxidase domain superfamily domain is present in all homologs. Conserved amino acid residues of the catalytic site are highlighted in red for Nod candidates and in green for NorZ or both enzyme types. *Globobulimina* Nor exhibits typical conserved residues found for Nod (Nor I: GloG15\_CONTIG49717:890-3289(+); Nor II: GloT15\_NODE\_10819:151-2556(+))

**Data S2. Detailed phylogenies of denitrification enzymes identified in *Globobulimina*. Related to Figures 2–4.** Complete phylogenies of denitrification enzymes identified in the current study and homologs from public databases. Colour coding of the terminal sequence names denote homologs obtained from genomics (GloG15: red) and transcriptomics (GloT14: green; GloT15: blue) assemblies or from public protein sequence databases (black). The background colour coding indicates different taxonomic groups. Different protein families are given at the tree branches. Note that sequences identified in *Globobulimina* can be

distinguished from associated bacteria by being binned into the *Globobulimina* draft genome (as indicated by #) and forming a clade with the corresponding transcripts obtained from transcriptome data. Original query sequences used to find homologs in sequencing assemblies are highlighted with asterisks (\*). Numbers at the branches indicate bootstrap support (BS) relying on 100 replicates, and the scale bar refers to substitutions per site. Thick branches mark the root neighbourhood as inferred with MAD. The branches in the root neighbourhood were identified as following: i) branch ancestral deviations ( $r$ ) were calculated with MAD, and the minimal value was determined ( $r_{\min}$ ), ii) the ambiguity index of branches in respect to  $r_{\min}$ , calculated as  $AI = r_{\min}/r_n$ , was inferred, iii) branches having an  $AI > 0.95$  are considered as the root neighbourhood. **A)** Nitrate/nitrite transporter (Nrt) protein. The tree shows two diverse clades supported by *Globobulimina* genomics and transcriptomics. The other clades are only supported by genomics, indicating representation by associated bacteria only. Nrt shown in the current study represents the NNP family of transporters or NarK protein superfamily belonging to the MFS transporter family. The clade associated with *Globobulimina* clade I contains eukaryotic Nrt protein (e.g., Nrt2.1 and Nrt2.4 found in *Arabidopsis thaliana*; O82811 and Q9FJH8, respectively), while the clade containing *Globobulimina* clade II is nearly exclusively bacterial (e.g., containing NarK and NarU from *Escherichia coli*; accessions P10903 and P37758, respectively). Homologs of transcriptome assemblies that group with *Chlorella* and *Symbiodinium* are likely contamination as they were not sorted into the *Globobulimina* draft genome, and the corresponding transcript contigs are lowly represented. Rooting was performed using representatives of DHA14 and ACS family of MFS transporters as outgroup. **B)** Copper-containing nitrite reductase (NirK). The tree shows two monophyletic clades of *Globobulimina* homologs grouping with type Class II of NirK. Both of them group with a prokaryotic clade containing archaea, albeit the BS is only 62. Although eukaryotic homologs are present, they form a distinct cluster. Note that NirK homologs previously proposed in association with denitrification of endobiotic origin in other foraminifera species [S9,S11] (highlighted by black circles) do not cluster with any homolog (neither *Globobulimina* nor associated bacteria) identified in the current study. The tree was rooted with MAD. **C)** Cytochrome cd1-containing nitrite reductase (NirS). The tree shows no homologs of the *Globobulimina* draft genome indicating a sole representation by associated bacteria. The most abundant sequences are related to *Colwellia psychrerythraea*, although overall a diversity of taxa is observed. Note that NirS homologs previously proposed in association with denitrification of endobiotic origin in other foraminifera by Bernhard and colleagues (highlighted by black circles; [S9,S11]) do not group closely with any homolog identified in the current study. Rooting was performed by applying the MAD method. **D)** Nitric oxide reductase (Nor). The tree shows two distinct clades representing NorB and NorZ protein families. While NorB is restricted to homologs found in genomics and, therefore, represents

associated bacteria, NorZ contains a *Globobulimina*-associated clade supported by *Globobulimina* genomics as well as transcriptomics. Only one homologous transcript was found outside of this clade, but as it exhibited only a low level of transcription, it probably represents contamination. The tree was rooted using two *cbb3* oxidases as outgroup. **E)** Prokaryotic periplasmic nitrate reductase (NapA). The tree shows only homologs from associated bacteria (i.e. genome data not allocated to the *Globobulimina* draft genome). The most represented genes group with homologs of *Vibrio* and *Photobacterium*. Although the clades at the top group with the NapA paralogs NarB and NasA, they were still included due to difficulties to clearly distinguish these paralogs from NapA orthologs. MAD rooting was applied, and paralogs were distinguished from orthologs using NarB and NasA outgroup sequences. Rooting of the final phylogeny is based on the MAD method. **F)** Membranebound nitrate reductase (NarG). The tree shows that only homologs in the genomics data were identified indicating the absence from the *Globobulimina* draft genome and sole representation of associated bacteria. Sequences form three clades. While automatic annotations from NCBI indicate a NarG function of all of them, only one clade contains protein sequences obtained from literature. The most abundant genes group with two sequences of Nitrospirae, although not closely. Rooting was performed by applying the MAD method. **G)** Nitrous oxide reductase (NosZ). Only the homologs from associated bacteria are represented. The most abundant genes cluster with *Colwellia psychrerythraea*. Rooting was performed by applying the MAD method. **H)** Eukaryotic assimilatory nitrate reductase (Nr) and paralogs. All Nr homologs of the *Globobulimina* draft genome form a clade with sulfite oxidases, albeit with a low BS of 40. The clade of Nr from literature is a sister clade to eukaryotic sulfite oxidases. Most other clades represent prokaryotic specific taxa as indicated by the absence of transcriptomics homologs and *Globobulimina* draft genome classification. Three transcript sequences branch distantly with Nr proteins but are neither supported by genomics nor do they show the typical functional domain structure of Nr (See Figure S3). The tree was rooted using the MAD method. **I)–K)** *Globobulimina* Nrt, NirK and Nor phylogeny (respectively) including foraminifera homologs from public databases. The trees were rooted at the corresponding branches determined for phylogenies without homologs from public databases. The topology of foraminifera homologs derived from public databases is highlighted by arrows.

**Table S4. Denitrification protein catalogue from literature and public databases.**

**Related to Figures 2–4.**

**Table S5. IDs of homologs removed for phylogenetic reconstructions. Related to Figures 2–4.**

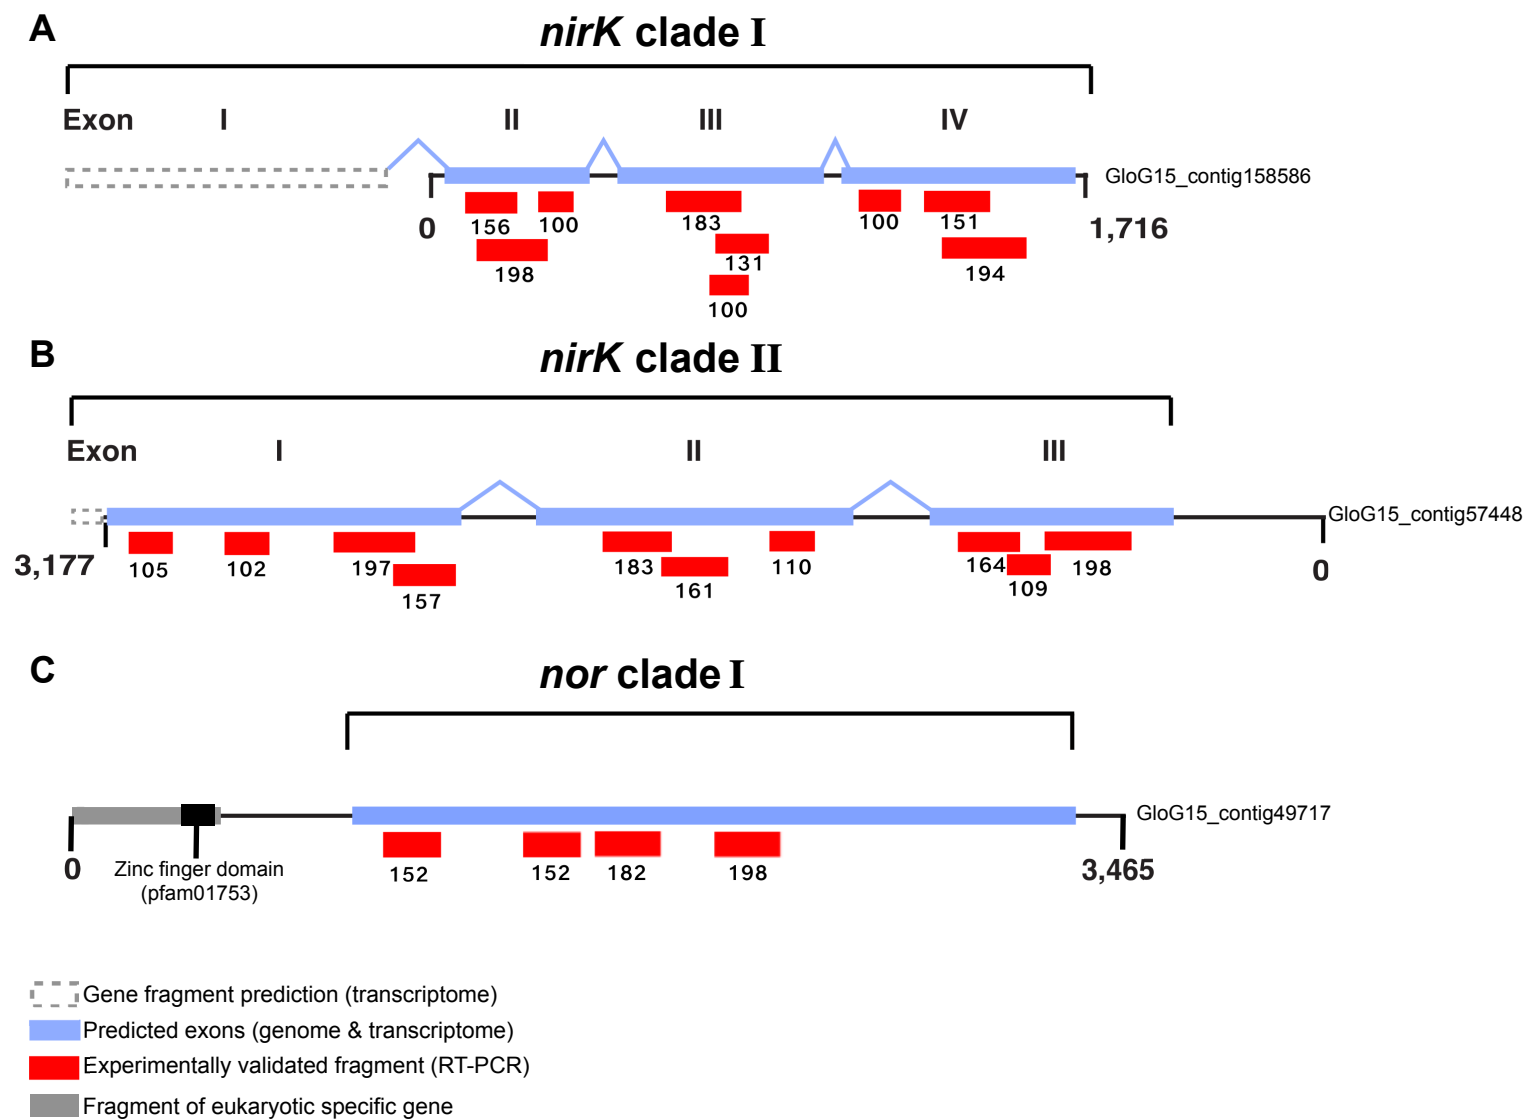

**Figure S1. Validation of denitrifying gene sequences. Related to Figures 3–4.** Schematic representation of validated gene fragments (red) and their corresponding size (numbers below fragments) for **A)** *nirK* clade I, **B)** *nirK* clade II and **C)** *nor* clade I.

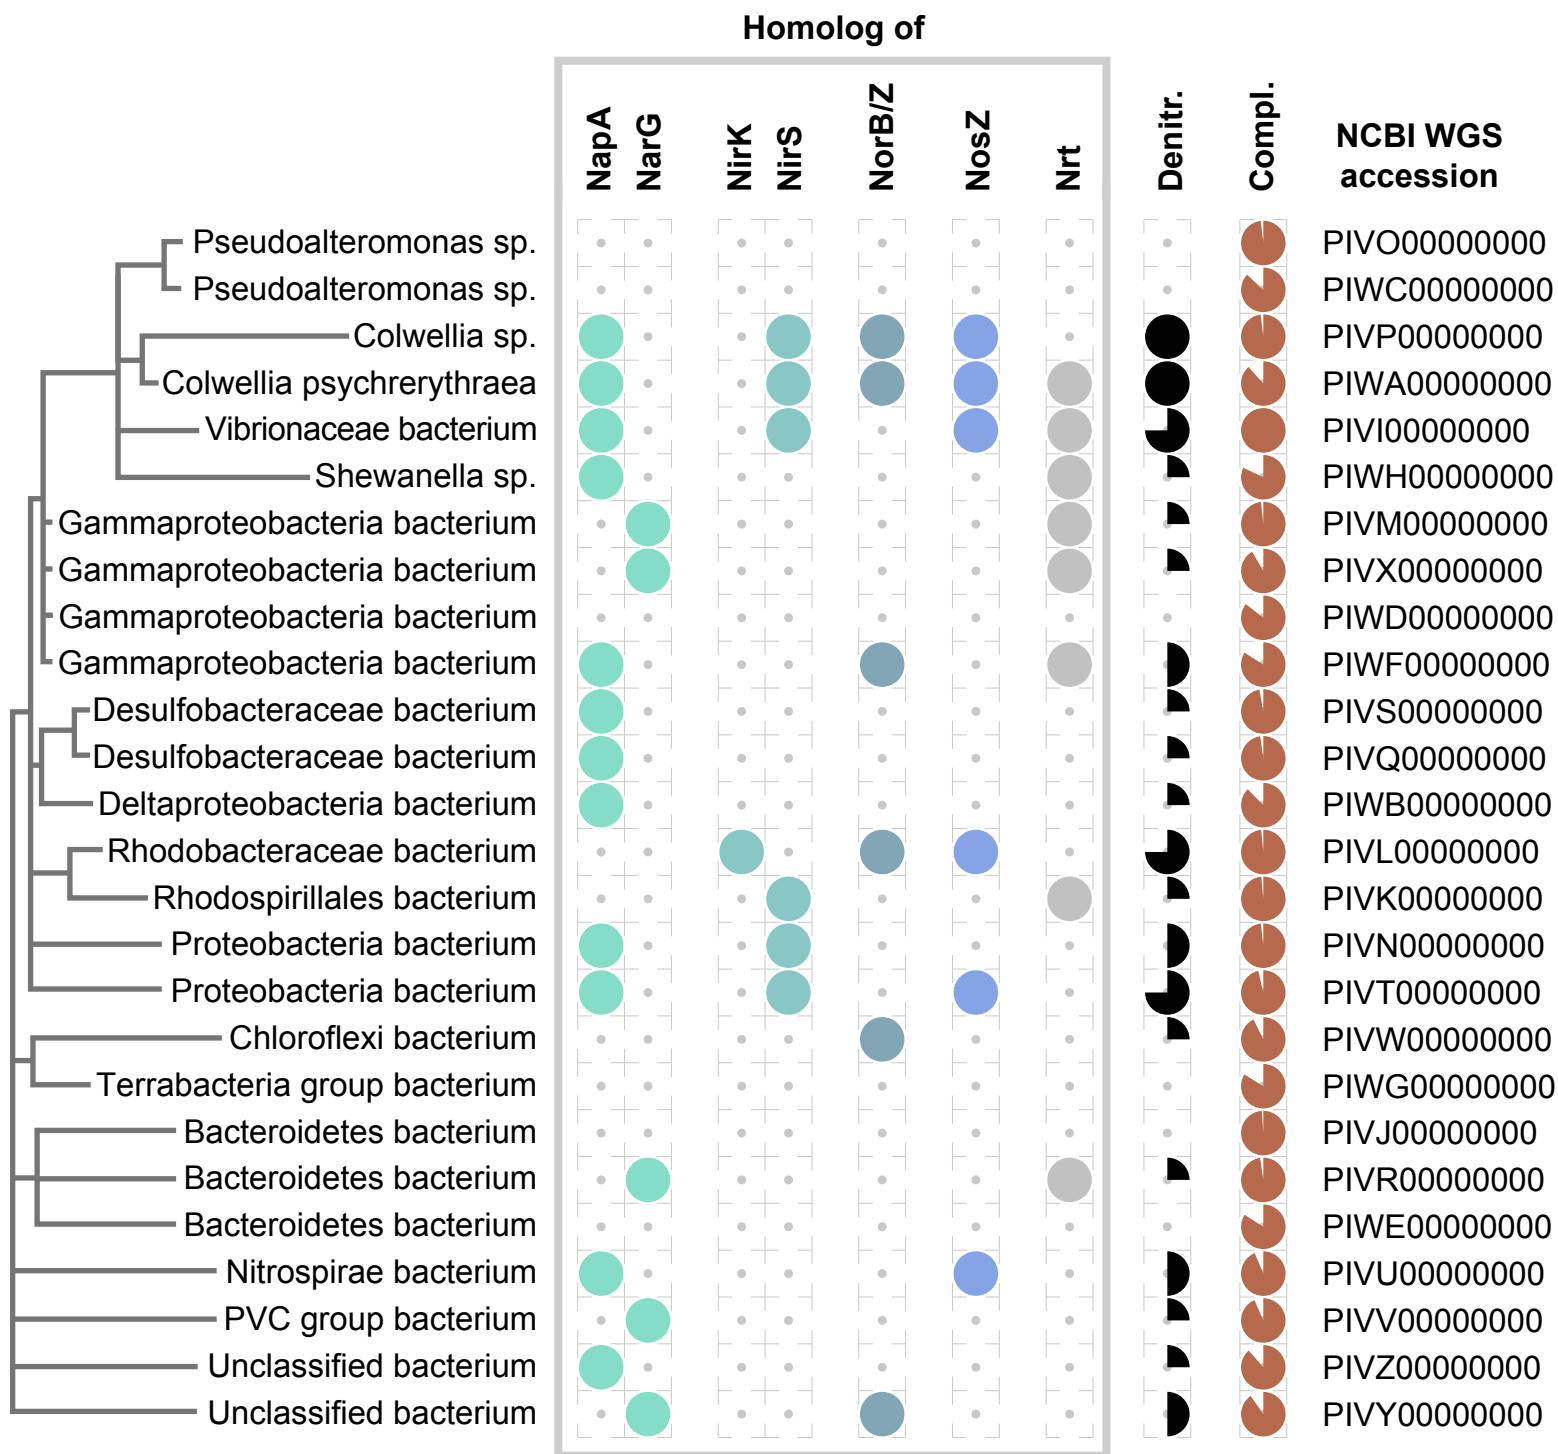

**Figure S2. Distribution of denitrification enzymes in *Globobulimina* associated bacterial draft genomes. Related to Figure 5.** Presence/absence of denitrification enzyme homologs in different draft genome obtained from genomics data. The proportion of covered denitrification steps and predicted genome completeness is indicated in the “Denitr.” and “Compl.” columns, respectively. Represented proteins refer to those protein sequences determined by phylogenies and shown in Data S2. The only exception is the NapA homolog of *Colwellia psychrerythraea* (GloG15\_CONTIG22649:3-230(-)). This homolog was replaced during protein clustering to reduce redundancy by GloG15\_CONTIG63497:3-2366(-) in Data S2 and is 99% identical to the former.

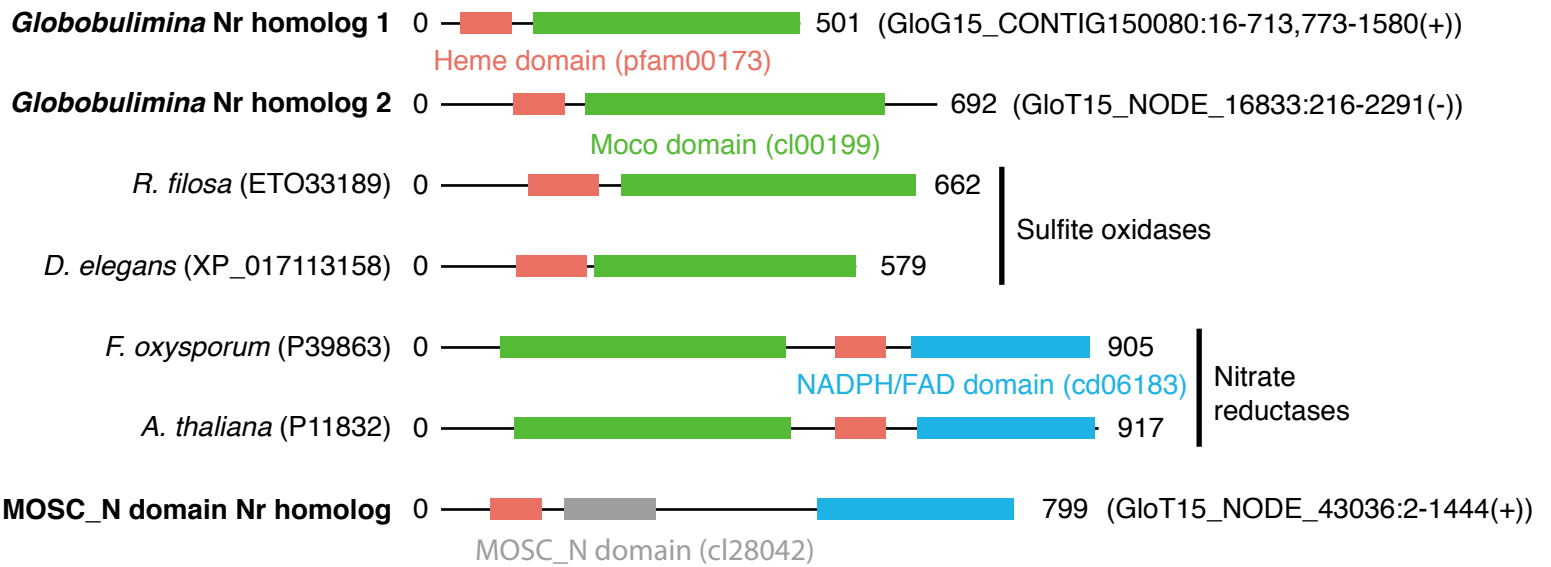

**Figure S3. Comparison of protein domain structure of *Globobulimina* Nr homologs, Nr and sulfite oxidase proteins. Related to Figure 5.** Conserved domain family are highlighted on protein sequences as identified by CD-search. Names and accessions of domains are given in corresponding colour. Domain structure of sulfite reductases and eukaryotic assimilatory nitrate reductases (Nr) differ substantially and the two representative homologs of *Globobulimina* clearly resemble the former. Names of sequences referring to the current study are shown in bold. An additional domain structure containing a ‘MOSC\_N’ domain was observed for an individual cluster of *Globobulimina* homologs. It is only represented by transcriptome data, hence encoding in the genome of *Globobulimina* is not supported.

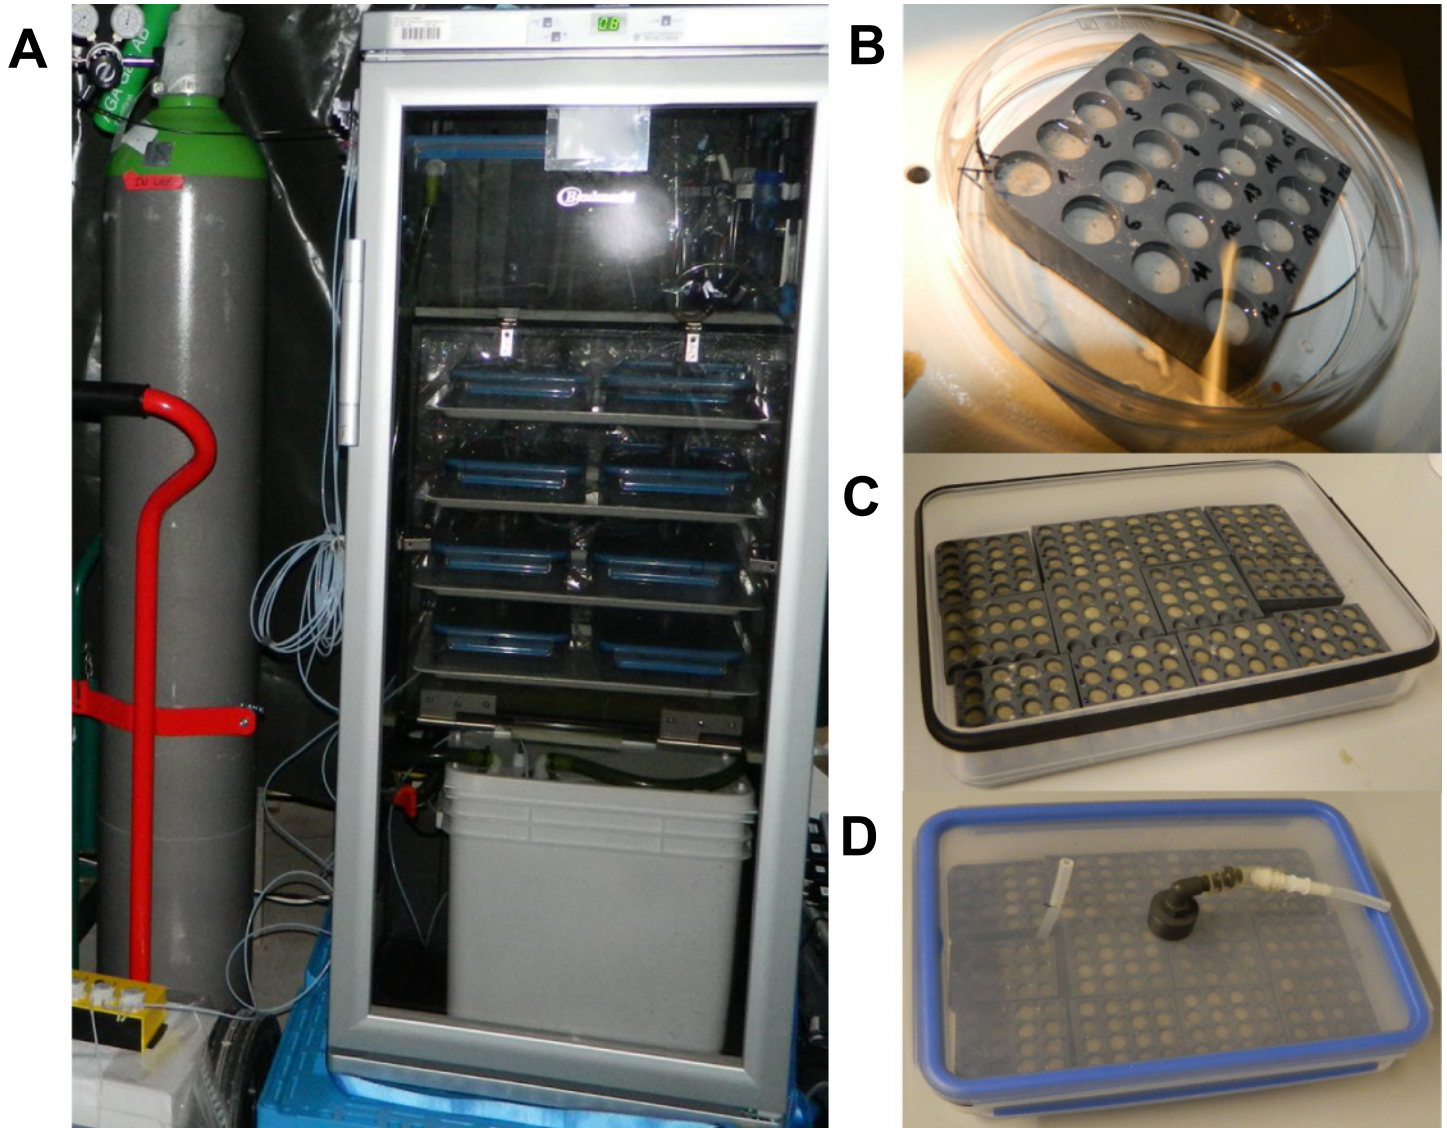

**Figure S4. Description of the incubation system. Related to STAR Methods.** **A)** Picked foraminifera were placed in PVC well plate where each well contained sterile quartz sand and one individual. **B)** Well plates were placed in culturing vessels that were filled with equilibrated sterile 30 psu,  $20 \mu\text{mol l}^{-1} \text{NO}_3^-$  ASW (**C–D**). These culturing vessels were then incorporated to one of two culturing systems assembled to reproduce Alsbäck Deep environmental conditions. One system was dedicated to natural oxygen concentration of the Alsbäck Deep ( $125 \mu\text{mol/l}$ ) during summer whereas the second system was completely drawn down of oxygen ( $<10 \mu\text{mol/l}$ ). Each system was filled with sterile ASW and sparged to oxygen concentration of interests with  $\text{N}_2$ ,  $\text{CO}_2$  and  $\text{O}_2$  pre-mixed gas (AGA Gas A; gas entries indicated by red arrows) before and during the length of the experiments. Culturing vessels were only added once systems were equilibrated and stable. The bioinformatics analysis of transcriptomes from the two incubation systems did not reveal patterns of significantly different transcript abundances for *Nrt*, *NirK* or *Nor* genes (Using R software package edgeR). Consequently, the genomics and transcriptomics data from the different conditions was merged with the ambient samples for further analysis.

| Replicate | Species              | Number of specimens | Mean denitrification rate <sup>1</sup> | 1 $\sigma_{sd}$ <sup>1</sup> | 1 $\sigma_{sem}$ <sup>1</sup> | N <sup>2</sup> |
|-----------|----------------------|---------------------|----------------------------------------|------------------------------|-------------------------------|----------------|
| 1         | <i>G. turgida</i>    | 4                   | 250                                    | 10.8                         | 4.8                           | 5              |
| 2         | <i>G. turgida</i>    | 4                   | 63                                     | 3.3                          | 1.7                           | 4              |
| 3         | <i>G. turgida</i>    | 3                   | 220                                    | 3.3                          | 1.2                           | 8              |
| 4         | <i>G. turgida</i>    | 5                   | 28                                     | 0.5                          | 0.2                           | 4              |
| 5         | <i>G. turgida</i>    | 5                   | 1712                                   | 10.8                         | 4.8                           | 5              |
| 6         | <i>G. turgida</i>    | 5                   | 105                                    | 1.6                          | 0.7                           | 5              |
| 7         | <i>G. turgida</i>    | 5                   | 75                                     | 2.5                          | 1.2                           | 4              |
| 8         | <i>G. turgida</i>    | 5                   | 29                                     | 1.8                          | 0.9                           | 4              |
| 1         | <i>G. auriculata</i> | 4                   | 99                                     | 3.3                          | 1.5                           | 5              |
| 2         | <i>G. auriculata</i> | 4                   | 46.9                                   | 1.0                          | 0.4                           | 5              |
| 3         | <i>G. auriculata</i> | 5                   | 124                                    | 4.0                          | 1.8                           | 5              |
| 4         | <i>G. auriculata</i> | 5                   | 29                                     | 0.6                          | 0.3                           | 5              |

<sup>1</sup> pmol individual<sup>-1</sup> day<sup>-1</sup>

<sup>2</sup> number of measurements

**Table S1. Denitrification rate measurements for *Globobulimina* spp. Related to Figure 1.**



|                                                                                                                                                                                                                                                                                                                                                                                                                                                                                                                                                                                                              |
|--------------------------------------------------------------------------------------------------------------------------------------------------------------------------------------------------------------------------------------------------------------------------------------------------------------------------------------------------------------------------------------------------------------------------------------------------------------------------------------------------------------------------------------------------------------------------------------------------------------|
| >Sorites sp. Nrt (CAMPEP_0114658376)<br>MCVQSAEGVTFVAVVPFVRPNVSGPVAGIVGAGGNVGMIFAFALFAYVDPNLSYEA<br>AWFILAAFVFIASFCLLISFTKEETAIANEKMKEIKTDDTVKADDGETTKLTTDAESV<br>VTTSSAGNLTTSPEGNQSNHNGIEMADL                                                                                                                                                                                                                                                                                                                                                                                                               |
| >Ammonia sp. 'North Sea' Nrt* (CAMPEP_0197046718)<br>METNPNTPKRLLRVGGISVNAHNKAVQFSIFSCKGSHVSNFWITTVSWICFFVWF<br>GNLNLPLPWITKDDNYGIPLSTAQKLSATLLTLSTTIFRVIIIGDLADKIGSRYCYLLILVC<br>SFIPVCALSFISSPTAYVVLNFFIGIVGASVITEYHTTQFYVDRLVGLANATAAGWGN<br>FGGGCAAIFMPFLATTVESKYGVNPWRYITFCSSLLIIPMILYYYFAVDTVNGNLNY<br>QSMVTRKLLDFSVLWQTVKDSRTWILFAVYMACFGVEITVISFLQEYFRDXYGLSP<br>DRAGLYVFMFSCNLFARVGGYGSIDILYKYSIQGRVYILVLTLLAESIFLLIFAFSSP<br>NLGYCVVILLFFSYVQCAEGITYAIVPFVKIGENKNIGPIYGIVAAGNAGSVLFAST<br>VFAFTPNVCEQPQLGCERNTISYQTAFIILAMFVGLVAFSLCLIKFTAIREADELLM<br>SFLKHHRAIYGQHEEQHAEQQQTPDTNNNNNSNNNNNTENAAQ |
| >Rosalina sp. Nrt (CAMPEP_0201568782)<br>MVSNRVVGFAQAITAGFGNFGGGCANSVMPLLLYHFDLSWRVYITILSVILILAIYYF<br>GTDDVFQPDNNNLNVKDNNNISSPNQSTTNDNDQAILLQHEESGSISSNNHPHNSN<br>RKFSSSDITITAPTHIRGSFVETICDYRVW                                                                                                                                                                                                                                                                                                                                                                                                            |
| >Elphidium margaritaceum Nrt (CAMPEP_0202730370)<br>MPTLARVIENTNDYNARVITFASGLLLIPLCLYYYFAVDTIEGNLDYKTMTRQKLL<br>DFSVLKATLRDRRTWILFVYMICFGVEITVISFMQDYLDRDTFNVDNNTAGLIVFVS<br>CLNLFARVSGGGSSDVLRYKFGIQGRVYILFLVIAEAIPLFIFGFSDFSLGYSIFVLLF<br>FSFYVQVAEGVTYAIVPFVKIGVHKKIGPIYGIVAAGNFGSFLFSGTLFYLTPNSQSL<br>ISYRLAFVILSLIIFLGAFTTLKIKFTAKEIRDADELLTSFLKVHSTLTMPPSPSPTKPV<br>TEAAVX                                                                                                                                                                                                                             |
| >Ammonia sp. 'Camargue' Nrt fragment 1* SRR2003283.150025:3-380(+)<br>SRERYILVLTLLAESIFLLIFAFSSFNLYCVVILLFFSYVQCAEGITYAIVPFVKIGEN<br>KNIGPIYGIVAAGNAGSVLFASTVFAFTPNVCEQPQLGCERIRSAIRLRLSLSCRCLS<br>VWSSFL*                                                                                                                                                                                                                                                                                                                                                                                                   |
| > Ammonia sp. 'Camargue' Nrt fragment 2* SRR2003283.72844:476-3(-)<br>GLFICRGHPDHTRRLYVVRPVLVSILLASCLWFVAVVITVLMMKYLLCCNYLSSTKQS<br>VQRTFTILSMKHTWIMAYLYTTFSGFIGFSASFVLIKQFYPNVNELHYAWLGPFFVAS<br>AIRPFGGWLSDKLGARVTHWTIVVKVTVIAVGLVIMTLAA                                                                                                                                                                                                                                                                                                                                                                   |
| > Ammonia sp. 'Camargue' Nrt fragment 3* Assembled from multiple<br>SRR2003283 reads<br>XXLSPVCLGSLRRAARDYAQKQASVRVVEYDEPNGAINMHDEDDFAASPKTNAA<br>TDDMKNDPDLGEPSSNNEPLKSHNTHTTTASRNRSPVCIHTFQAHTNIVAIYHFWSV<br>TESDTRDFWRQYQGSVATKNLWISIGNLTLFAVWIIWSIVVLLFTLAA                                                                                                                                                                                                                                                                                                                                              |
| >Bulimina marginata Nrt fragment SRR2003397.185677:2-451(+)<br>QPRVYITILMLGFFSLYCQIAQGIVFAIIPGLPHQRYIGLIMGLIASGGNFGAIMGSFFVF<br>YNVPLNIHYQTAWAICAFVFSVLFIFKFTKXIDEALWTKSNDLFSIIVQQPKKSG<br>NATRRYQDSLFIYRIKLFPPFLIFC*                                                                                                                                                                                                                                                                                                                                                                                        |
| >Nonionellina sp. Nrt fragment 1 SRR2003403.1266:546-1(-)<br>EYLTLEVRIGGWSSRIKNLVSLKVKILASIDRLSAFPVAGMALVTVHRLYHCIFIDWY<br>CWCQSFVITQYHTTAMFAGKTGTANATSAGWGNFGGGCANFFMPLLYFHFKDTY<br>ELSNSTAWRLCMIIPLGSLYIVMSVYVWVFTVKNKPGSDVQKEKPDGIGLDQNPCKAE<br>ERLCLKSDSRG*                                                                                                                                                                                                                                                                                                                                              |
| >Nonionellina sp. Nrt fragment 2 SRR2003403.26623:325-2(-)<br>MFAGKTGTANATSAGWGNFGGGCANFFMPLLYFHFKDTYELSNSTAWRLCMIIPL<br>GLSYIVMSVYVWVFTVKNKPGSDVQKEKPDGIGLDQKPKQGGGASVFKVGGPRL                                                                                                                                                                                                                                                                                                                                                                                                                              |
| >Brizalina sp. NirK fragment SRR2003388.68811:22-213(+)<br>MMVVGFHLVEVMEYLSMKDHSVQTVLFDNADGTDIEFVSHFMRDYTTPTIDTSHK<br>FPFQFHL                                                                                                                                                                                                                                                                                                                                                                                                                                                                                |
| >Rosalina sp. NirK fragment 1 Assembled from MMETSP0190 reads<br>ELEAGHTFEFFTYNATIPGPPIRVRVGDWIDL                                                                                                                                                                                                                                                                                                                                                                                                                                                                                                            |
| >Rosalina sp. NirK fragment 2 Assembled from MMETSP0190 reads<br>SPQQNIQTTPPGGCAVTDWRHDTGQF                                                                                                                                                                                                                                                                                                                                                                                                                                                                                                                  |
| >Brizalina sp. Nor fragment 1 Assembled from SRR2003388 reads<br>VCLGLRRAARSTTEYDGGILSKKAAERAXYIAVMLFSXLPPLVXDIIIFIGXPNQQVXL<br>HXVQHLVPRKXFHXYYXHLIRGKYIQMNEKGTCLNKRKENQQFIMKEVWLVLDVN<br>FWNIFGAGILGSFINLPVVNYMHSTYLTGNHAHSAMWGVKGNIALAGMLFCMQHS<br>IKKNHGVNLXVLLHFGHLMVVLHXXCFMFIPIGLFHMVYVMDQGLWAARNHQMOTS<br>QAYQLLSKGRAIGGHLFLWDGLFPLVYFTCSRYFHLKPTTKIMVMQNINVRG                                                                                                                                                                                                                                       |
| >Brizalina sp. Nor fragment 2 Assembled from SRR2003388 reads<br>SRGRDIXSIYHRNCSILYREMGSAADVAERATYIAVMLFFLTATIGVGHNFYWIAPK<br>TGVIALGSAFSTTQVIPLILLTFNAWKYIQMNEKAQIEQKGNQQFIMKEVWLVLDVN<br>NFWNIFGAGILGSFINLPVVNYMHSTYLTGNHAHSAMWGVKGNIALAGMLFCMQH<br>SNKKNHGHQNXVLLQFWSFNGGIALMMFLCLFQLVLFHMVYVMDQG                                                                                                                                                                                                                                                                                                         |

\*Different *Ammonia* sp. isolates are distinguished by adding unique isolation source names

**Table S2. Foraminifera protein sequences derived from public database data. Related to Figures 2–4.**

| Gene                    | Name     | Fragment length | Forward primers (5' to 3') | Reverse primers (5' to 3') |
|-------------------------|----------|-----------------|----------------------------|----------------------------|
| 18S                     | 14F1 - B | ≈1200           | AAGGGCACCACAAGAACGC        | TGATCCTTCTGCAGCTTCACCTAC   |
| <i>nirK</i><br>clade I  | E2_a     | 100             | TGACATCAAGGAGCGGTACG       | GATGCTGCCACCGTAGTAA        |
|                         | E2_b     | 156             | GGACCACATCGCCAAAGGAA       | GGCGTAGGTTCGGTTGAACTT      |
|                         | E2_c     | 198             | GGACCACATCGCCAAAGGA        | TCGTACCGTCTCTTGATGTC       |
|                         | E3_a     | 183             | GCAGATTGGCGGCATGATAC       | ACCATATCGATCGCGGTCAC       |
|                         | E3_b     | 131             | CGGGTGCAAAGAAGGAAACG       | GGAGTATGCAAAGTCGTCGC       |
|                         | E3_c     | 100             | TTGTCGGGTGCAAAGAAGGA       | ATACGCAATCATCGCCACCT       |
|                         | E4_a     | 151             | AATAGTGTGGATGGTGGCGG       | GAGTGCCATAATCGCGGAGA       |
|                         | E4_b     | 100             | TGTCGCGGATCCTATGCTTG       | GACGTCCCCGACATTAACGA       |
|                         | E4_c     | 194             | TGGATAGTTTTGGTCGCGG        | CCATCAGCAACACTCACCGA       |
| <i>nirK</i><br>clade II | E1_a     | 105             | TCAGTGGCGAATCCACCAA        | ACAGGTGGCGGTTAAAAGCA       |
|                         | E1_b     | 102             | AACGGCAAAGGAGTACAGT        | TTCAATTCGCCGGTTGTGC        |
|                         | E1_c     | 157             | CGAGTTCGCATGAACACAGC       | GAGATCCATCCACTCGCACA       |
|                         | E1_d     | 197             | ACACACCGGGTCACCTTAAC       | CCGCTCATTGCGTGGAAATC       |
|                         | E2_a     | 183             | TGATGTTTAACGGTGCCCA        | TGTTTTGCTGTGGCGATGTG       |
|                         | E2_b     | 161             | ACACATCGCCACAGCAAAC        | GTCGCAGGCTCGAATAAAGC       |
|                         | E2_c     | 110             | GACTGCGTGTTTTGTCCGTG       | TCCGTCCGCAGACTACATTG       |
|                         | E3_a     | 198             | CGCAGATGGCAGTGATGTTG       | ACGTACGTCAAAGCATCCGA       |
|                         | E3_b     | 109             | GTAAGTGAGTGGCGGTGGT        | TCACTGCCATCTGCGTTGAA       |
|                         | E3_c     | 168             | GGAATGCGTCAGATGGAGGT       | ACCACCGCCACTCACTTTAC       |
| <i>nor</i><br>clade I   | E1_a     | 152             | TTGGGGAAGTGGCGCATTAT       | GCCATCCCCTAAGAAGGAGC       |
|                         | E1_b     | 152             | CAGGATTTGGAGACTGGCGT       | ATGTAACAGGCCGAGAAGCC       |
|                         | E1_c     | 198             | ATCAAATGCGCGAGAAAGC        | GGCATGAGCATGATTGCCAG       |
|                         | E1_d     | 182             | TGTTCTTTGTGGCTTGGGT        | TACGCCATTCGCCCTGAAT        |

Table S3. PCR and RT-PCR primers for the rRNA gene 18S, Nor, Nir clade I and clade II. Related to Figure 1 and Figures 3-4.

## Supplemental References

- S1. Boeckmann, B., Bairoch, A., Apweiler, R., Blatter, M.-C., Estreicher, A., Gasteiger, E., Martin, M. J., Michoud, K., O'Donovan, C., Phan, I., et al. (2003). The SWISS-PROT protein knowledgebase and its supplement TrEMBL in 2003. *Nucleic Acids Res* *31*, 365–370.
- S2. Philippot, L. (2002). Denitrifying genes in bacterial and Archaeal genomes. *Biochim. Biophys. Acta* *1577*, 355–376.
- S3. Philippot, L., Mirleau, P., Mazurier, S., Siblot, S., Hartmann, A., Lemanceau, P., and Germon, J. C. (2001). Characterization and transcriptional analysis of *Pseudomonas fluorescens* denitrifying clusters containing the nar, nir, nor and nos genes. *Biochim. Biophys. Acta* *1517*, 436–440.
- S4. Kim, S.-W., Fushinobu, S., Zhou, S., Wakagi, T., and Shoun, H. (2009). Eukaryotic nirK genes encoding copper-containing nitrite reductase: originating from the protomitochondrion? *Appl. Environ. Microbiol.* *75*, 2652–2658.
- S5. Chen, J. Y., Chang, T., Chang, W. C., Liu, M. Y., Payne, W. J., and LeGall, J. (1996). Cloning, characterization, and expression of the nitric oxide-generating nitrite reductase and of the blue copper protein genes of *Achromobacter cycloclastes*. *Biochem. Biophys. Res. Commun.* *219*, 423–428.
- S6. Nishiyama, M., Suzuki, J., Kukimoto, M., Ohnuki, T., Horinouchi, S., and Beppu, T. (1993). Cloning and characterization of a nitrite reductase gene from *Alcaligenes faecalis* and its expression in *Escherichia coli*. *J. Gen. Microbiol.* *139*, 725–733.
- S7. Ichiki, H., Tanaka, Y., Mochizuki, K., Yoshimatsu, K., Sakurai, T., and Fujiwara, T. (2001). Purification, characterization, and genetic analysis of Cu-containing dissimilatory nitrite reductase from a denitrifying halophilic archaeon, *Haloarcula marismortui*. *J. Bacteriol.* *183*, 4149–4156.
- S8. Fukuda, Y., Tse, K. M., Suzuki, M., Diederichs, K., Hirata, K., Nakane, T., Sugahara, M., Nango, E., Tono, K., Joti, Y., et al. (2016). Redox-coupled structural changes in nitrite reductase revealed by serial femtosecond and microfocus crystallography. *J. Biochem.* *159*, 527–538.
- S9. Bernhard, J. M., Edgcomb, V. P., Casciotti, K. L., McIlvin, M. R., and Beaudoin, D. J. (2012). Denitrification likely catalyzed by endobionts in an allogromiid foraminifer. *ISME J* *6*, 951–960.
- S10. Hallin, S., Throbäck, I. N., Dicksved, J., and Pell, M. (2006). Metabolic profiles and genetic diversity of denitrifying communities in activated sludge after addition of methanol or ethanol. *Appl. Environ. Microbiol.* *72*, 5445–5452.
- S11. Bernhard, J. M., Casciotti, K. L., McIlvin, M. R., Beaudoin, D. J., Visscher, P. T., and Edgcomb, V. P. (2012). Potential importance of physiologically diverse benthic foraminifera in sedimentary nitrate storage and respiration. *J Geophys Res* *117*, G03002.
- S12. Pruitt, K. D., Tatusova, T., Brown, G. R., and Maglott, D. R. (2012). NCBI Reference Sequences (RefSeq): current status, new features and genome annotation policy. *Nucleic Acids Res* *40*, D130–D135.
- S13. Rees, E., Siddiqui, R. A., Köster, F., Schneider, B., and Friedrich, B. (1997). Structural gene (nirS) for the cytochrome cd1 nitrite reductase of *Alcaligenes eutrophus* H16. *Appl. Environ. Microbiol.* *63*, 800–802.
- S14. Dang, H., Wang, C., Li, J., Li, T., Tian, F., Jin, W., Ding, Y., and Zhang, Z. (2009). Diversity and distribution of sediment nirS-encoding bacterial assemblages in response to environmental gradients in the eutrophied Jiaozhou Bay, China. *Microb Ecol* *58*, 161–169.
- S15. Mosier, A. C., and Francis, C. A. (2010). Denitrifier abundance and activity across the San Francisco Bay estuary. *Environ Microbiol Rep* *2*, 667–676.
- S16. Ettwig, K. F., Speth, D. R., Reimann, J., Wu, M. L., Jetten, M. S. M., and Keltjens, J. T. (2012). Bacterial oxygen production in the dark. *Front Microbiol* *3*, 273.
- S17. Matsumoto, Y., Tosha, T., Pislakov, A. V., Hino, T., Sugimoto, H., Nagano, S., Sugita, Y., and Shiro, Y. (2012). Crystal structure of quinol-dependent nitric oxide reductase from *Geobacillus stearothermophilus*. *Nat. Struct. Mol. Biol.* *19*, 238–245.
- S18. Sabaty, M., Schwintner, C., Cahors, S., Richaud, P., and Verméglio, A. (1999). Nitrite and nitrous oxide reductase regulation by nitrogen oxides in *Rhodobacter sphaeroides* f. sp. denitrificans IL106. *J. Bacteriol.* *181*, 6028–6032.
- S19. Pao, S. S., Paulsen, I. T., and Saier, M. H. (1998). Major facilitator superfamily. *Microbiol. Mol. Biol. Rev.* *62*, 1–34.
- S20. Kakinuma, M., Coury, D. A., Nakamoto, C., Sakaguchi, K., and Amano, H. (2008). Molecular analysis of physiological responses to changes in nitrogen in a marine macroalga, *Porphyra yezoensis* (Rhodophyta). *Cell Biol. Toxicol.* *24*, 629–639.



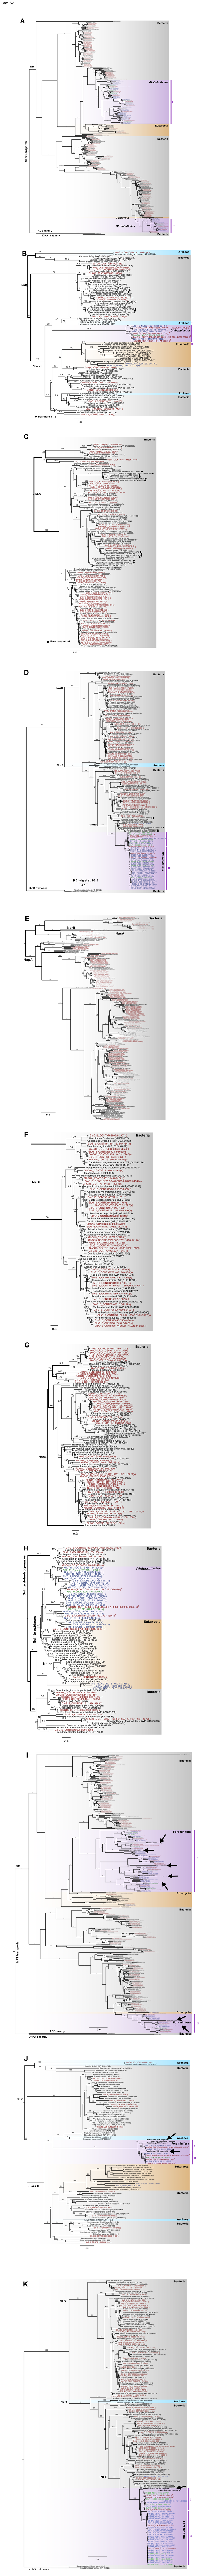

Supplement: EMS83819-supplement-Supplemental_Information.pdf [file EMS83819-supplement-Supplemental_Information.pdf]
